# Supplementary material for: Tools for Assessing the Protective Efficacy of TB Vaccines in Humans: in vitro Mycobacterial Growth Inhibition Predicts Outcome of in vivo Mycobacterial Infection
Source: Front Immunol. 2020 Jan 10;10:2983. doi: 10.3389/fimmu.2019.02983 (PMC6968127; doi:10.3389/fimmu.2019.02983)
Supplement: Supplementary Table 2 — List of significantly enriched gene sets in good vs. poor MGIA controllers. Gene-set enrichment analysis (GSEA) was performed using the C2 curated gene sets and an FDR cut-off of < 0.05. Good controllers showed enrichment of 135 gene sets compared with poor controllers, which are shown here ranked by normalized enrichment score (nES). The top 50 pathways were categorized according to function and/or overlap in constituent genes. Pathways shaded in gray could not be meaningfully categorized in this context. [file Table_2.XLSX]

## Sheet: gsea_report_for_na_pos_15659717
NAME	Category	NES	FDR q-val
YAO_TEMPORAL_RESPONSE_TO_PROGESTERONE_CLUSTER_11		2.27467	0.00644129
KEGG_PROTEASOME	Proteasome	2.26558	0.00453573
PENG_GLUTAMINE_DEPRIVATION_DN	Cell metabolism	2.2367	0.00433203
PID_IL23_PATHWAY	IL23 pathway	2.18621	0.00879352
NAGASHIMA_EGF_SIGNALING_UP		2.18492	0.00703481
KEGG_ANTIGEN_PROCESSING_AND_PRESENTATION	Antigen processing/presentation	2.1593	0.00758268
ELVIDGE_HIF1A_TARGETS_UP	Hypoxia	2.15894	0.00649944
KEGG_GRAFT_VERSUS_HOST_DISEASE	Antigen processing/presentation	2.1579	0.00584782
REACTOME_ER_PHAGOSOME_PATHWAY	Phagosome pathway	2.15368	0.00592266
KEGG_ALLOGRAFT_REJECTION	Antigen processing/presentation	2.13233	0.00727084
ELVIDGE_HYPOXIA_DN	Hypoxia	2.13078	0.00673105
KEGG_SPLICEOSOME	Alternative splicing	2.11674	0.00724502
MODY_HIPPOCAMPUS_NEONATAL		2.1018	0.00847749
KARLSSON_TGFB1_TARGETS_UP	Cytokine signalling	2.09954	0.00805828
GROSS_HYPOXIA_VIA_HIF1A_UP	HIF1A-associated genes	2.08731	0.00837967
TIEN_INTESTINE_PROBIOTICS_24HR_UP		2.07969	0.00914898
PENG_LEUCINE_DEPRIVATION_DN	Cell metabolism	2.07923	0.00868762
DORN_ADENOVIRUS_INFECTION_24HR_DN		2.0588	0.0115142
MUELLER_PLURINET	Stem cells	2.05261	0.0119996
PENG_RAPAMYCIN_RESPONSE_DN	Cell metabolism	2.03815	0.0144966
SASSON_RESPONSE_TO_GONADOTROPHINS_DN	Stem cells	2.03529	0.0144264
PID_IL12_2PATHWAY	IL23 pathway	2.02265	0.0161186
KEGG_AUTOIMMUNE_THYROID_DISEASE	Antigen processing/presentation	2.01489	0.0174955
ELVIDGE_HIF1A_AND_HIF2A_TARGETS_UP	Hypoxia	2.01415	0.0169272
BHATI_G2M_ARREST_BY_2METHOXYESTRADIOL_UP		2.00763	0.0172886
BIOCARTA_PROTEASOME_PATHWAY	Proteasome	2.00634	0.0169211
BHATTACHARYA_EMBRYONIC_STEM_CELL	Stem cells	1.99987	0.018175
BENPORATH_PROLIFERATION		1.99969	0.0175259
TARTE_PLASMA_CELL_VS_PLASMABLAST_DN		1.99858	0.01719
TSUNODA_CISPLATIN_RESISTANCE_DN	Associated with lung conditions (sarcoma, smoking etc.)	1.99678	0.016963
FOURNIER_ACINAR_DEVELOPMENT_LATE_2	Hypoxia	1.99408	0.0170476
WU_CELL_MIGRATION	Associated with lung conditions (sarcoma, smoking etc.)	1.98788	0.0180579
MANALO_HYPOXIA_DN	Hypoxia	1.97642	0.0204128
DORN_ADENOVIRUS_INFECTION_32HR_DN		1.96762	0.0221342
RHODES_CANCER_META_SIGNATURE	Response to mycobacteria metabolism	1.96373	0.0226104
PEDERSEN_METASTASIS_BY_ERBB2_ISOFORM_1		1.96328	0.022054
DORN_ADENOVIRUS_INFECTION_48HR_DN		1.96249	0.0215628
HINATA_NFKB_TARGETS_FIBROBLAST_UP	Inflammatory response	1.95795	0.0222916
FALVELLA_SMOKERS_WITH_LUNG_CANCER	Associated with lung conditions (sarcoma, smoking etc.)	1.9579	0.02172
PELLICCIOTTA_HDAC_IN_ANTIGEN_PRESENTATION_DN	Antigen processing/presentation	1.95754	0.021273
MALONEY_RESPONSE_TO_17AAG_DN	Stem cells	1.94542	0.0240041
REACTOME_MITOTIC_M_M_G1_PHASES		1.94176	0.024415
REACTOME_ANTIGEN_PROCESSING_CROSS_PRESENTATION	Antigen processing/presentation	1.93561	0.0257166
KEGG_TYPE_I_DIABETES_MELLITUS	Antigen processing/presentation	1.9345	0.0254567
REACTOME_AUTODEGRADATION_OF_THE_E3_UBIQUITIN_LIGASE_COP1	Phagosome pathway	1.9337	0.0251783
REACTOME_MITOTIC_PROMETAPHASE		1.93304	0.024853
JECHLINGER_EPITHELIAL_TO_MESENCHYMAL_TRANSITION_DN		1.93231	0.0246548
MONNIER_POSTRADIATION_TUMOR_ESCAPE_UP	Response to mycobacteria metabolism	1.93167	0.0242496
REACTOME_DESTABILIZATION_OF_MRNA_BY_AUF1_HNRNP_D0	Phagosome pathway	1.9309	0.0240466
ONO_AML1_TARGETS_UP	IL23 pathway	1.92758	0.0244205
MULLIGAN_NTF3_SIGNALING_VIA_INSR_AND_IGF1R_UP		1.92687	0.0241203
SIMBULAN_UV_RESPONSE_NORMAL_DN		1.92504	0.0242569
YAMASHITA_LIVER_CANCER_STEM_CELL_DN		1.92043	0.0250687
REACTOME_PROCESSING_OF_CAPPED_INTRON_CONTAINING_PRE_MRNA		1.91615	0.0259722
REACTOME_SCF_BETA_TRCP_MEDIATED_DEGRADATION_OF_EMI1		1.91609	0.025524
NAKAMURA_TUMOR_ZONE_PERIPHERAL_VS_CENTRAL_UP		1.91404	0.0256934
RODRIGUES_THYROID_CARCINOMA_POORLY_DIFFERENTIATED_UP		1.90986	0.0264938
ZHANG_TLX_TARGETS_60HR_DN		1.90783	0.0265483
SASSON_RESPONSE_TO_FORSKOLIN_DN		1.90512	0.0268863
REACTOME_SIGNALING_BY_WNT		1.9028	0.0271251
OUELLET_OVARIAN_CANCER_INVASIVE_VS_LMP_UP		1.90172	0.0270206
REACTOME_CDT1_ASSOCIATION_WITH_THE_CDC6_ORC_ORIGIN_COMPLEX		1.90123	0.026774
MARSON_FOXP3_TARGETS_DN		1.90038	0.0265738
SOTIRIOU_BREAST_CANCER_GRADE_1_VS_3_UP		1.89823	0.0268293
WANG_SMARCE1_TARGETS_DN		1.88757	0.0298854
DORSEY_GAB2_TARGETS		1.88527	0.0301999
ELVIDGE_HYPOXIA_BY_DMOG_DN		1.88346	0.0304063
REACTOME_RECYCLING_PATHWAY_OF_L1		1.88256	0.0302251
ZAMORA_NOS2_TARGETS_UP		1.8802	0.0306669
PURBEY_TARGETS_OF_CTBP1_NOT_SATB1_UP		1.87737	0.0311715
LEE_AGING_MUSCLE_UP		1.87704	0.0308608
JIANG_TIP30_TARGETS_DN		1.87584	0.0307563
REACTOME_MRNA_SPLICING_MINOR_PATHWAY		1.87274	0.0312745
REACTOME_VIF_MEDIATED_DEGRADATION_OF_APOBEC3G		1.87247	0.0309561
REACTOME_L1CAM_INTERACTIONS		1.87173	0.0308879
SCHUHMACHER_MYC_TARGETS_UP		1.87149	0.0305669
GARGALOVIC_RESPONSE_TO_OXIDIZED_PHOSPHOLIPIDS_MAGENTA_UP		1.87145	0.0301866
CHENG_RESPONSE_TO_NICKEL_ACETATE		1.86601	0.0313704
PID_IL4_2PATHWAY		1.86266	0.0322223
ZWANG_CLASS_1_TRANSIENTLY_INDUCED_BY_EGF		1.86261	0.0318356
DAIRKEE_CANCER_PRONE_RESPONSE_BPA		1.85047	0.0358188
REACTOME_P53_INDEPENDENT_G1_S_DNA_DAMAGE_CHECKPOINT		1.8501	0.0355567
LI_LUNG_CANCER		1.84994	0.0351438
REACTOME_ACTIVATION_OF_NF_KAPPAB_IN_B_CELLS		1.84721	0.0357437
REACTOME_METABOLISM_OF_RNA		1.8428	0.0368041
TAKAO_RESPONSE_TO_UVB_RADIATION_UP		1.84172	0.0369758
REACTOME_CDK_MEDIATED_PHOSPHORYLATION_AND_REMOVAL_OF_CDC6		1.8415	0.0366693
NGUYEN_NOTCH1_TARGETS_DN		1.84101	0.0363849
JOHANSSON_GLIOMAGENESIS_BY_PDGFB_UP		1.83839	0.0368755
REACTOME_DNA_REPLICATION		1.83712	0.0369548
RODRIGUES_THYROID_CARCINOMA_ANAPLASTIC_UP		1.8348	0.0375176
REACTOME_INTERACTIONS_OF_VPR_WITH_HOST_CELLULAR_PROTEINS		1.83415	0.0373761
REACTOME_REGULATION_OF_ORNITHINE_DECARBOXYLASE_ODC		1.83342	0.0371973
REACTOME_MRNA_PROCESSING		1.83305	0.0369788
GARY_CD5_TARGETS_DN		1.83236	0.0368207
DE_YY1_TARGETS_DN		1.83185	0.0366552
WENG_POR_TARGETS_LIVER_UP		1.82782	0.0378811
SCHLOSSER_MYC_TARGETS_REPRESSED_BY_SERUM		1.82532	0.0385642
REACTOME_CROSS_PRESENTATION_OF_SOLUBLE_EXOGENOUS_ANTIGENS_ENDOSOMES		1.8249	0.0382797
SANA_RESPONSE_TO_IFNG_DN		1.82359	0.0385573
WEST_ADRENOCORTICAL_TUMOR_UP		1.82219	0.0387131
REACTOME_METABOLISM_OF_NON_CODING_RNA		1.8209	0.0387284
PID_IL27_PATHWAY		1.81959	0.0387661
REACTOME_ASSEMBLY_OF_THE_PRE_REPLICATIVE_COMPLEX		1.81628	0.0397365
CAIRO_HEPATOBLASTOMA_UP		1.81512	0.0398491
KEGG_CARDIAC_MUSCLE_CONTRACTION		1.81498	0.0394854
WONG_EMBRYONIC_STEM_CELL_CORE		1.81377	0.0396607
BASSO_CD40_SIGNALING_UP		1.81195	0.0400741
ONDER_CDH1_TARGETS_1_DN		1.80841	0.0412847
PODAR_RESPONSE_TO_ADAPHOSTIN_UP		1.80832	0.0409325
DAZARD_UV_RESPONSE_CLUSTER_G2		1.80799	0.0406573
BURTON_ADIPOGENESIS_PEAK_AT_2HR		1.80659	0.0409508
BIDUS_METASTASIS_UP		1.80571	0.0409792
REACTOME_P53_DEPENDENT_G1_DNA_DAMAGE_RESPONSE		1.80525	0.0408577
REACTOME_HIV_INFECTION		1.80227	0.0414464
REACTOME_HOST_INTERACTIONS_OF_HIV_FACTORS		1.80227	0.0411035
DORN_ADENOVIRUS_INFECTION_12HR_UP		1.80133	0.0410737
KEGG_HUNTINGTONS_DISEASE		1.79545	0.0431553
KIM_WT1_TARGETS_UP		1.79054	0.0449091
HOUSTIS_ROS		1.7902	0.0446665
JOHNSTONE_PARVB_TARGETS_2_UP		1.78885	0.0450431
AMIT_SERUM_RESPONSE_60_MCF10A		1.78758	0.0450965
EPPERT_PROGENITOR		1.78752	0.0447537
CHARAFE_BREAST_CANCER_LUMINAL_VS_BASAL_DN		1.78693	0.0446434
BARIS_THYROID_CANCER_UP		1.78401	0.04543
ZHOU_INFLAMMATORY_RESPONSE_LIVE_UP		1.78291	0.0455804
VERNELL_RETINOBLASTOMA_PATHWAY_UP		1.77927	0.0468006
KAMMINGA_EZH2_TARGETS		1.77707	0.0472858
PID_AP1_PATHWAY		1.77535	0.0477746
PHONG_TNF_RESPONSE_NOT_VIA_P38		1.77495	0.0475205
KOKKINAKIS_METHIONINE_DEPRIVATION_96HR_UP		1.77459	0.0472887
PHONG_TNF_RESPONSE_VIA_P38_PARTIAL		1.773	0.0476222
REACTOME_INFLUENZA_LIFE_CYCLE		1.76976	0.0489064
BASSO_B_LYMPHOCYTE_NETWORK		1.76967	0.0486229
RUTELLA_RESPONSE_TO_HGF_UP		1.76679	0.0496921
