# Supplementary material for: Tools for Assessing the Protective Efficacy of TB Vaccines in Humans: in vitro Mycobacterial Growth Inhibition Predicts Outcome of in vivo Mycobacterial Infection
Source: Front Immunol. 2020 Jan 10;10:2983. doi: 10.3389/fimmu.2019.02983 (PMC6968127; doi:10.3389/fimmu.2019.02983)
Supplement: Supplementary Table 3 — List of significantly enriched gene sets in poor vs. good MGIA controllers. Gene-set enrichment analysis (GSEA) was performed using the C2 curated gene sets and an FDR cut-off of < 0.05. Poor controllers showed enrichment of 21 gene sets compared with good controllers, which are shown here ranked by normalized enrichment score (nES). Pathways were categorized according to function and/or overlap in constituent genes; those shaded in gray could not be meaningfully categorized in this context. [file Table_3.XLSX]

## Sheet: GSEA neg
NAME	Category	NES	FDR q-val
FARDIN_HYPOXIA_11	Hypoxia	-2.68917	0
ELVIDGE_HIF1A_TARGETS_DN	Hypoxia	-2.65274	0
ELVIDGE_HIF1A_AND_HIF2A_TARGETS_DN	Hypoxia	-2.54613	0
MENSE_HYPOXIA_UP	Hypoxia	-2.49105	0
REACTOME_GLYCOLYSIS	Glycolysis	-2.42429	0.000223869
MOOTHA_GLYCOLYSIS	Glycolysis	-2.40929	0.000186557
ELVIDGE_HYPOXIA_BY_DMOG_UP	Hypoxia	-2.33129	0.000403682
WANG_ADIPOGENIC_GENES_REPRESSED_BY_SIRT1	Hypoxia	-2.32528	0.000353222
KEGG_GLYCOLYSIS_GLUCONEOGENESIS	Glycolysis	-2.22536	0.00233851
ELVIDGE_HYPOXIA_UP	Hypoxia	-2.18297	0.00369322
SEMENZA_HIF1_TARGETS	Hypoxia	-2.17301	0.00361827
LUI_THYROID_CANCER_CLUSTER_2		-2.12375	0.00611232
KEGG_GALACTOSE_METABOLISM	Glycolysis	-2.12123	0.00568579
KIM_HYPOXIA	Hypoxia	-2.0521	0.0117764
REACTOME_GLUCONEOGENESIS	Glycolysis	-2.02501	0.0144801
QI_HYPOXIA	Hypoxia	-2.023	0.013928
REACTOME_GLUCOSE_METABOLISM	Glycolysis	-2.00999	0.0150497
MOOTHA_GLUCONEOGENESIS	Glycolysis	-2.00588	0.0151289
SERVITJA_ISLET_HNF1A_TARGETS_DN	Hypoxia	-1.95937	0.0242481
GROSS_HIF1A_TARGETS_DN	Hypoxia	-1.95846	0.0233219
LEONARD_HYPOXIA	Hypoxia	-1.91309	0.0350047
